# Supplementary material for: Research progress in the off-target effects of Bacille Calmette–Guérin vaccine
Source: PubMed Central journal article supplement — Chin Med J (Engl). 2023 Dec 13;137(17):2065–74. doi: 10.1097/CM9.0000000000002890 (PMC11374297; doi:10.1097/cm9.0000000000002890), 2023-12-13
Supplement: cm9-137-2065-s001.pdf [file cm9-137-2065-s001.pdf]

**Supplementary table 1: List of RCTs on off-target effect of BCG vaccine against COVID-19.**

| References                           | Sample size | Age (years) | BCG strains/dosage             | Control/dosage | Location                   | Clinical trial registration No. | Findings                                                                                                                                                                                                                                         |
|--------------------------------------|-------------|-------------|--------------------------------|----------------|----------------------------|---------------------------------|--------------------------------------------------------------------------------------------------------------------------------------------------------------------------------------------------------------------------------------------------|
| Tsilika <i>et al</i> <sup>[82]</sup> | 301         | ≥50         | Moscow/<br>0.1 mL              | Saline/0.1 mL  | Greece                     | NCT04414267                     | BCG vaccination may provide potential protection against COVID-19 in patients aged over 50 years with comorbidities.                                                                                                                             |
| Moorlag <i>et al</i> <sup>[83]</sup> | 2014        | ≥60         | Danish<br>1331/0.1 mL          | Saline/0.1 mL  | Netherlands                | NCT04417335                     | BCG vaccination boosted cytokine responses generated by influenza and SARS-CoV-2 and elicited greater antibody titers following COVID-19 infection, rather than affecting the incidence of RTIs, including SARS-CoV-2 infection, in the elderly. |
| Santos <i>et al</i> <sup>[84]</sup>  | 510         | ≥18         | Moreau or<br>Moscow<br>/0.1 mL | Saline/0.1 mL  | Brazil                     | NCT04659941                     | (1) No protective HR for COVID-19 infection rates has been shown by BCG (HR: 0.65, 95% CI: 0.31–1.39).<br>(2) BCG has higher immunoglobulin G levels against COVID-19 than placebo, but no statistical significance.                             |
| Claus <i>et al</i> <sup>[85]</sup>   | 1511        | ≥18         | Danish<br>1331/0.1 mL          | Saline/0.1 mL  | Netherlands                | NCT04328441                     | (1) Vaccination with BCG vaccine did not reduce SARS-CoV-2 infection, infection duration, or severity.<br>(2) BCG vaccination may facilitate SARS-CoV-2 antibodies during SARS-CoV-2 infection.                                                  |
| Upton <i>et al</i> <sup>[86]</sup>   | 1000        | ≥18         | Danish<br>1331/0.1 mL          | Saline/0.1 mL  | South Africa               | NCT04379336                     | Health care workers were not protected by BCG against SARS-CoV-2 infection or severe disease and hospitalization due to COVID-19.                                                                                                                |
| Pittet <i>et al</i> <sup>[87]</sup>  | 3988        | ≥18         | Danish/<br>0.1 mL              | Saline/0.1 mL  | Australia,<br>Netherlands, | NCT04327206                     | BCG vaccination had no effect on the risk of COVID-19 infection among health care workers (HR:                                                                                                                                                   |

---

|                                  |                           |
|----------------------------------|---------------------------|
| Spain,<br>England, and<br>Brazil | 1.23, 95% CI: 0.96–1.59). |
|----------------------------------|---------------------------|

---

BCG: Bacille Calmette-Guérin; COVID-19: Coronavirus disease 2019; HR: Hazard ratio; RCT: Randomized controlled trial; RTI: Respiratory tract infection; SARS-CoV-2: Severe acute respiratory syndrome coronavirus 2; TB: Tuberculosis; –: Not available.

**Supplementary table 2: Trials of using BCG vaccine as part of COVID-19 vaccine regimen or treatment.**

| References                                  | Sample size | Age (years) | Location  | Study design                                                                                                                                                                                                                                                                                                                                                                                                                                                                                       | Objectives/findings                                                                                                                                                                                                                                                                                                                                                                                                                                                                                                                 |
|---------------------------------------------|-------------|-------------|-----------|----------------------------------------------------------------------------------------------------------------------------------------------------------------------------------------------------------------------------------------------------------------------------------------------------------------------------------------------------------------------------------------------------------------------------------------------------------------------------------------------------|-------------------------------------------------------------------------------------------------------------------------------------------------------------------------------------------------------------------------------------------------------------------------------------------------------------------------------------------------------------------------------------------------------------------------------------------------------------------------------------------------------------------------------------|
| Ramos-Martinez <i>et al</i> <sup>[88]</sup> | 60          | 41 (30–50)* | Mexico    | Subjects were randomly assigned BCG or placebo, followed by two doses of Pfizer-BioNTech (21 days apart), and blood samples were collected 30 days after each vaccination to determine serum concentrations of Th1/Th2 cytokines. Neutralizing antibody detection and HLA-DRB loci genotyping were performed after the full immunization.                                                                                                                                                          | (1) Serum cytokine concentrations (i.e., IL-1 $\beta$ , IL-4, IL-6, IL-12p70, IL-13, IL-18, GM-CSF, INF- $\gamma$ , and TNF- $\alpha$ ) and neutralizing antibody titers were higher in the BCG vaccine-BioNTech group compared to the placebo-BioNTech group.<br>(2) In the placebo-BioNTech group and the BCG vaccine-BioNTech group, 12 and 9 HLA-DRB1 alleles were identified, respectively. The DRB1*04 allele showed higher frequency in the placebo-BioNTech group; however, no confounding effect of this allele was found. |
| Counoupas <i>et al</i> <sup>[89]</sup>      | –           | –           | Australia | Mice were vaccinated subcutaneously in the footpad with $5 \times 10^5$ CFU of BCG alone, 5 $\mu$ g of SpK <sup>†</sup> combined with either BCG (BCG <sup>SpK</sup> ) or 100 $\mu$ g of Alhydrogel (Invivogen, California, USA), or BCG:CoVac <sup>‡</sup> . Three weeks after the first vaccination, some mice were boosted with 5 $\mu$ g SpK and 100 $\mu$ g Alhydrogel. Blood samples were collected every 2 weeks after the first immunization. Experimental methods included flow cytometry | (1) BCG:CoVac induced the production of not only virus-specific IgG antibodies but also high titers of specific anti-SARS-CoV-2 neutralizing antibodies and Th1-biased cytokines.<br>(2) Single-dose BCG:CoVac was sufficient to completely protect mice from COVID-19 infection with no detectable virus and minimal inflammatory manifestations in the mice's lungs.<br>(3) Heterologous boosting vaccine (SpK formulated in alum) of BCG:CoVac-primed mice enhanced the SARS-CoV-2                                               |

|                    |    |       |         |                                                                                                                                                                                                                                                                                                                                                                                                                                                                                                                                                                                                                                                                                                                                |                                                                                                                                                                                                                                                                               |
|--------------------|----|-------|---------|--------------------------------------------------------------------------------------------------------------------------------------------------------------------------------------------------------------------------------------------------------------------------------------------------------------------------------------------------------------------------------------------------------------------------------------------------------------------------------------------------------------------------------------------------------------------------------------------------------------------------------------------------------------------------------------------------------------------------------|-------------------------------------------------------------------------------------------------------------------------------------------------------------------------------------------------------------------------------------------------------------------------------|
| Xu <sup>[90]</sup> | 20 | 24–74 | America | <p>analysis to assess T cell responses, ELISA antibody detection and high-content live SARS-CoV-2 neutralization assay, SARS-CoV-2 challenge assay, and <i>Mycobacterium tuberculosis</i> aerosol challenge. Screened for eligibility after informed consent, 20 patients with lighter than mild COVID-19 patients were inoculated with one-dose AD26-BCG<sup>§</sup> via the percutaneous route of a multiple-puncture device at week 3 day 3. Patients should take testing COVID-19 by standard RT-PCR assay at week 1 day 1 and week 3 day 4, and take testing for COVID-19 spike protein derivative at week 4 day 3. And patients should report online on COVID-19 symptoms every day for up to 30 days (NCT02403505).</p> | <p>specific antibody response and effectively neutralized the mutant strains of B.1.1.7 and B.1.351.</p> <p>To assess AD26-BCG to treat infection of multiple gene mutation COVID-19 virus strains that suggests the potential for clinical benefit of COVID-19 patients.</p> |
|--------------------|----|-------|---------|--------------------------------------------------------------------------------------------------------------------------------------------------------------------------------------------------------------------------------------------------------------------------------------------------------------------------------------------------------------------------------------------------------------------------------------------------------------------------------------------------------------------------------------------------------------------------------------------------------------------------------------------------------------------------------------------------------------------------------|-------------------------------------------------------------------------------------------------------------------------------------------------------------------------------------------------------------------------------------------------------------------------------|

BCG: Bacille Calmette-Guérin; COVID-19: Coronavirus disease 2019; SARS-CoV-2: Severe acute respiratory syndrome coronavirus 2; HLA-DRB: human leukocyte antigen DR beta; Th1: T help 1; Th2: T help 1; IL-1 $\beta$ : interleukin-1 beta; IL-4: interleukin-4; IL-6: interleukin-6; IL-12p70, IL-13: interleukin-13; IL-18: interleukin-18; GM-CSF: Granulocyte-macrophage colony-stimulating factor, INF- $\gamma$ : interferon-gamma; and TNF- $\alpha$ : tumor necrosis factor-alpha; CFU: colony-forming unit; SpK: SARS-CoV-2 full-length spike stabilised, trimeric protein; ELISA: the enzyme-linked immunosorbent assay; AD26: replication-incompetent human adenovirus type 26 vector; -: Not available. \*The data were medians (interquartile ranges) of age. <sup>†</sup>SpK was the full-length spike-stabilized trimeric protein of SARS-CoV-2, expressed and purified in EXP1293F<sup>™</sup> cells. <sup>‡</sup>BCG:CoVac was the combination of BCG (5  $\times$  10<sup>5</sup> CFU), SpK (5  $\mu$ g), and Alhydrogel (100  $\mu$ g), and developed jointly by the University of Sydney and the Centenary Institute. <sup>§</sup>AD26-BCG was the combination of therapeutic biologics mix that was obtained with the use of Janssen Ad26 COVID-19 spike organism plus BCG organism
